# Supplementary material
Source: PubMed Central journal article supplement (PMC4187718)
Supplement: MCB.01646-13_zmb999100600so1.pdf [file MCB.01646-13_zmb999100600so1.pdf]

Supplementary  
Figure 1

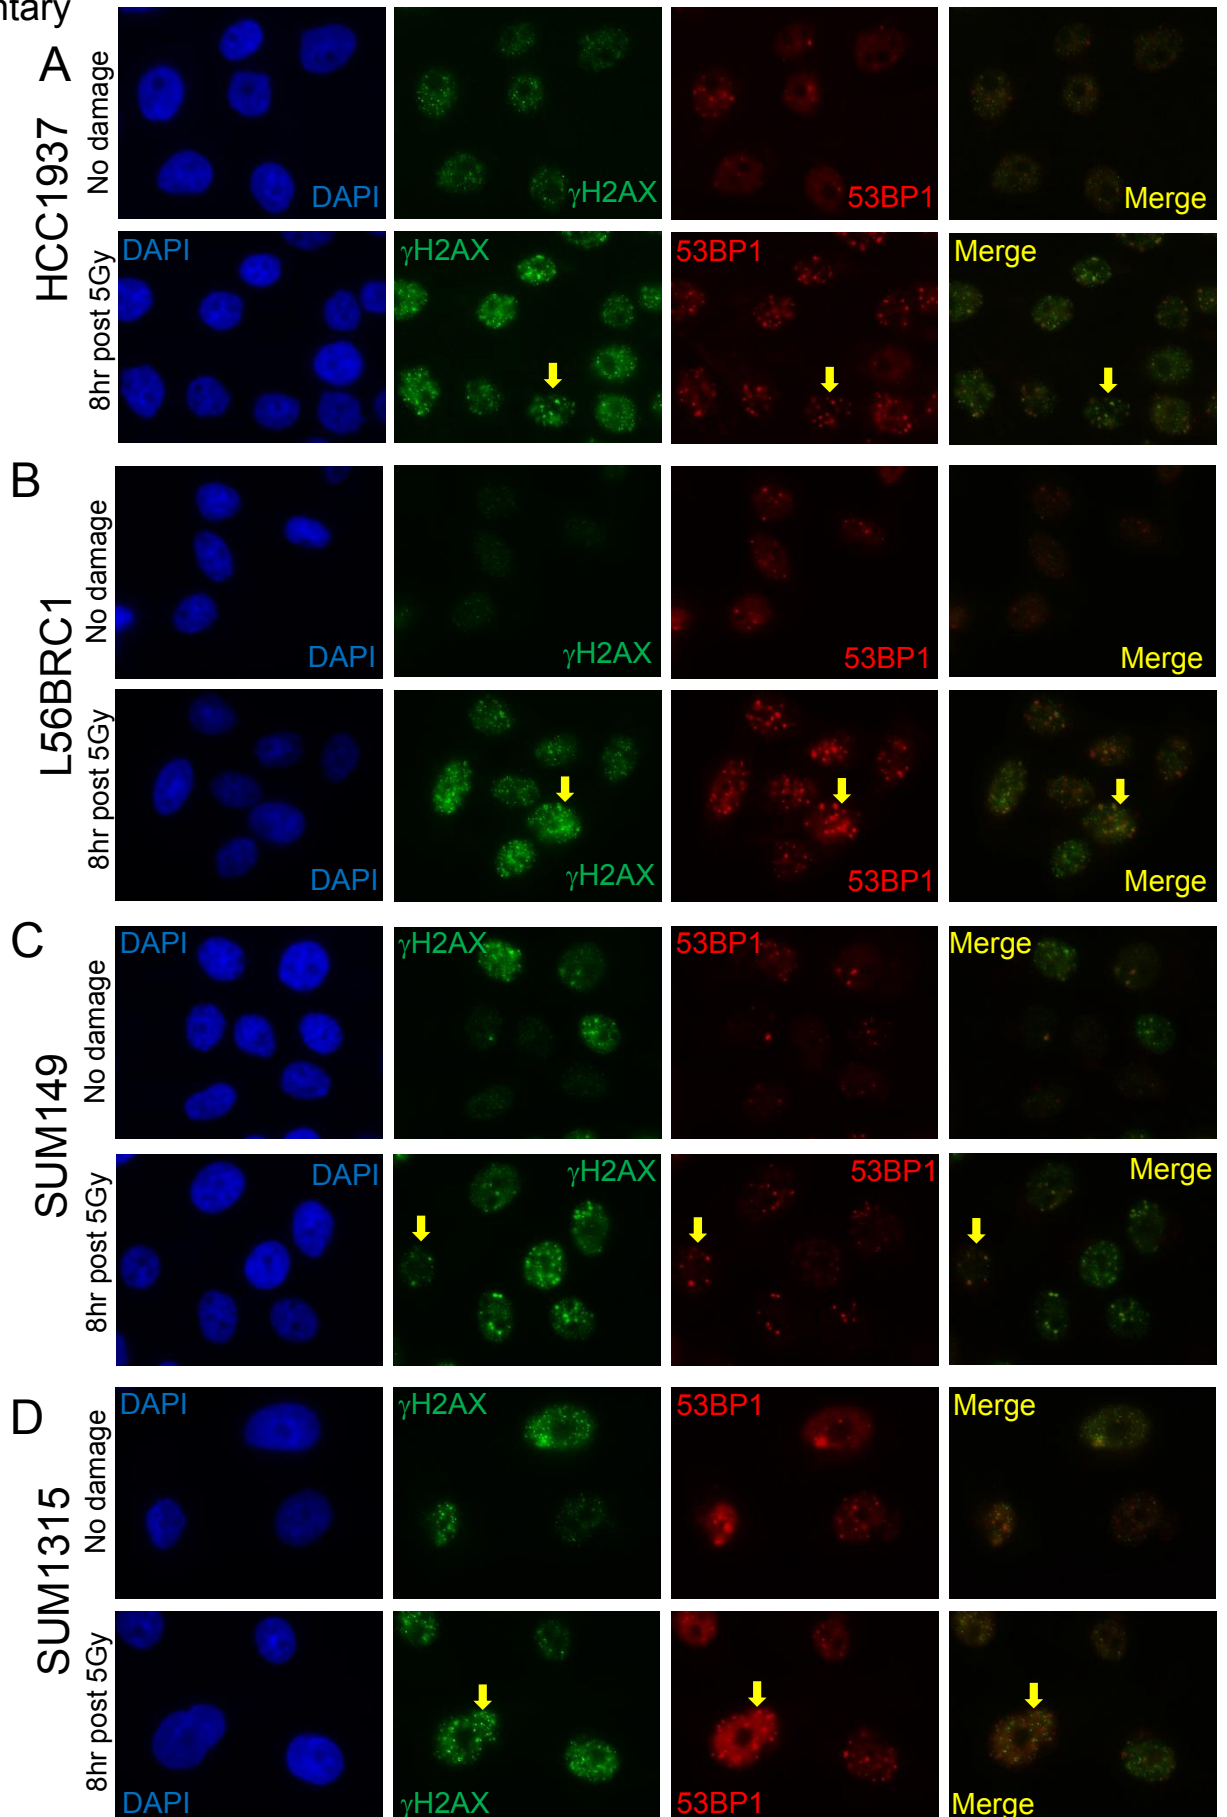

Supplementary Fig. 1-Post-Damage 53BP1 foci in BRCA1 mutant cell lines: The BRCA1 mutant cell lines HCC1937 (A), L56BRC1 (B), SUM149 (C), and SUM1315 (D) were treated with or without 5Gy irradiation and stained with  $\gamma$ H2AX and 53BP1 antibodies 8 hours after treatment. The brightness has been increased by 20% and the contrast increased by 20% using PowerPoint in every panel to alleviate difficulties with the conversion of the images to PDF. Yellow arrows indicate a representative cell in which there is co-localization.

## Supplementary Figure 2

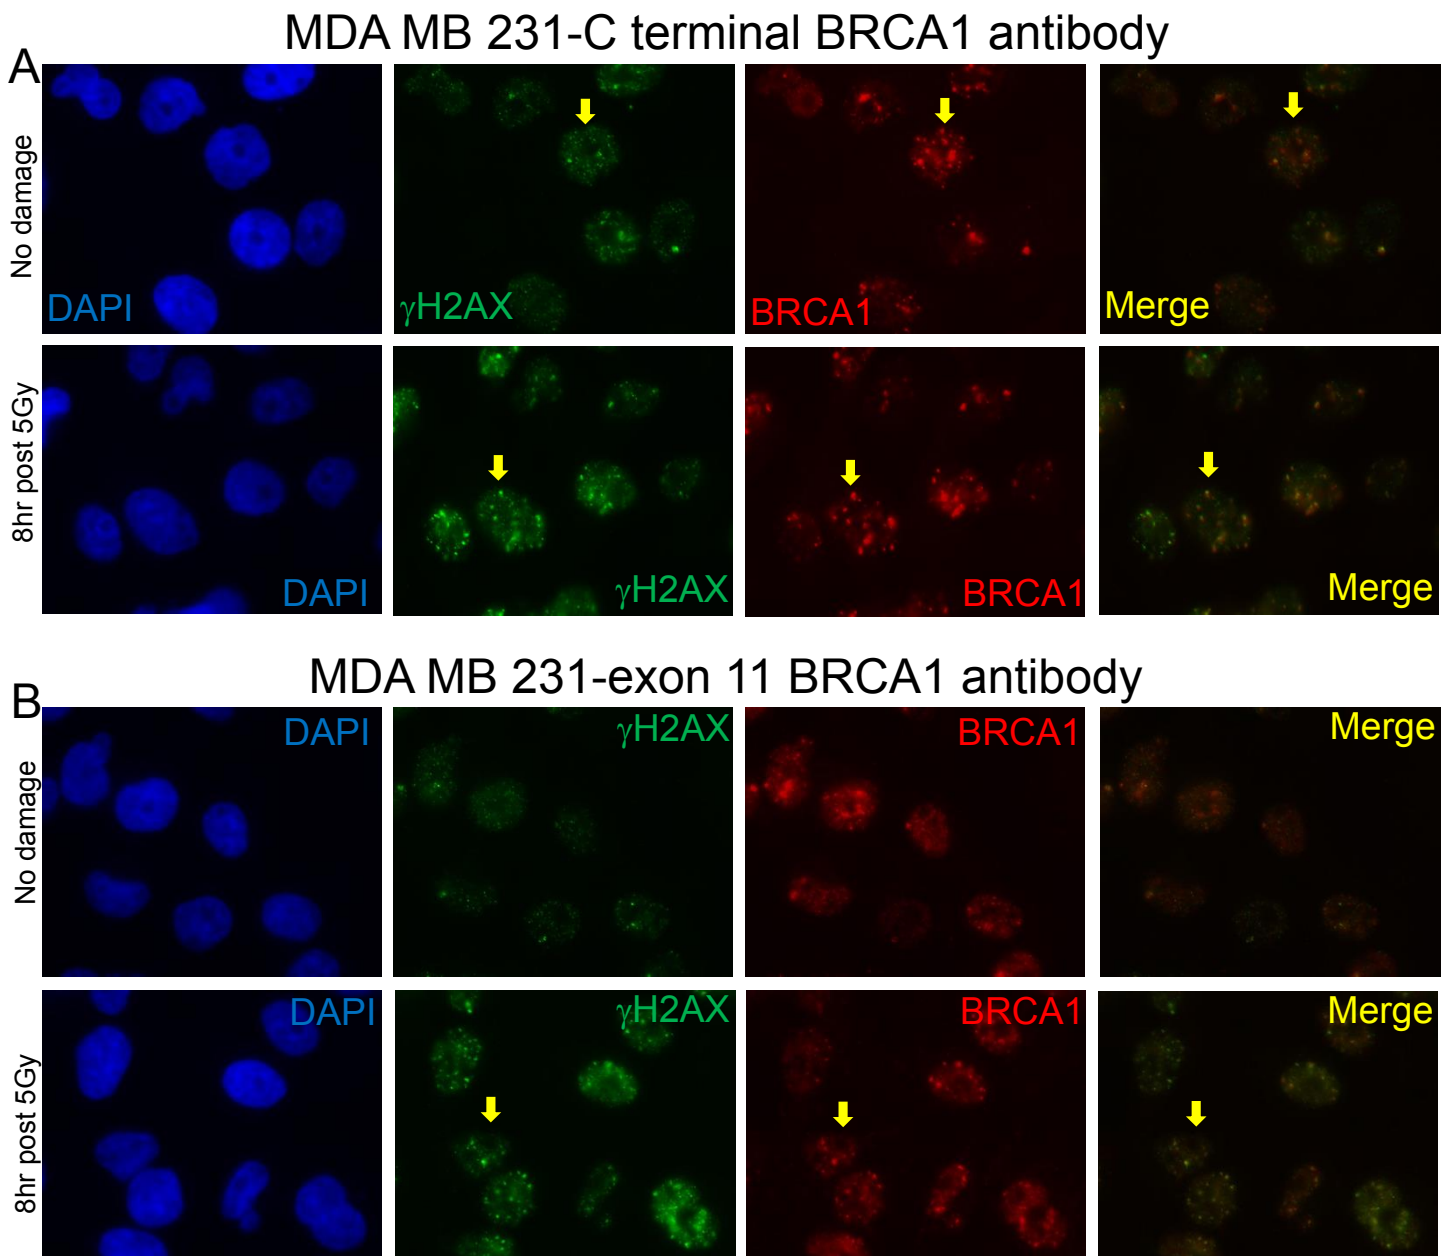

Supplementary Figs. 2, 3, 4- Post-damage BRCA1 foci in  $\Delta 11b$  expressing mutant lines are not recognized by exon 11 specific BRCA1 antibodies: The two BRCA1 mutant control lines expressing  $\Delta 11b$  but not p220 (L56BRC1-Supplementary Fig. 3 and SUM149-Supplementary Fig. 4), and a sporadic BLC line (MDA MB 231-Supplementary Fig. 2) were exposed to 5Gy gamma irradiation (IR) or no IR and allowed to recover for 8hr. All cells were then stained with a C-terminal specific BRCA1 antibody that recognizes both p220 and  $\Delta 11b$  (Supplementary Figs. 2A, 3A, 4A) or an exon 11 BRCA1 antibody that cannot recognize  $\Delta 11b$  (Supplementary Figs. 2B, 3B, and 4B), both along with  $\gamma$ H2AX to mark DNA damage. Yellow arrows are placed next to a few representative cells in which there is co-localization. The brightness has been increased by 20% and the contrast increased by 20% using PowerPoint in every panel to alleviate difficulties with the conversion of the images to PDF.

## Supplementary Figure 3

### L56BRC1-C terminal BRCA1 antibody

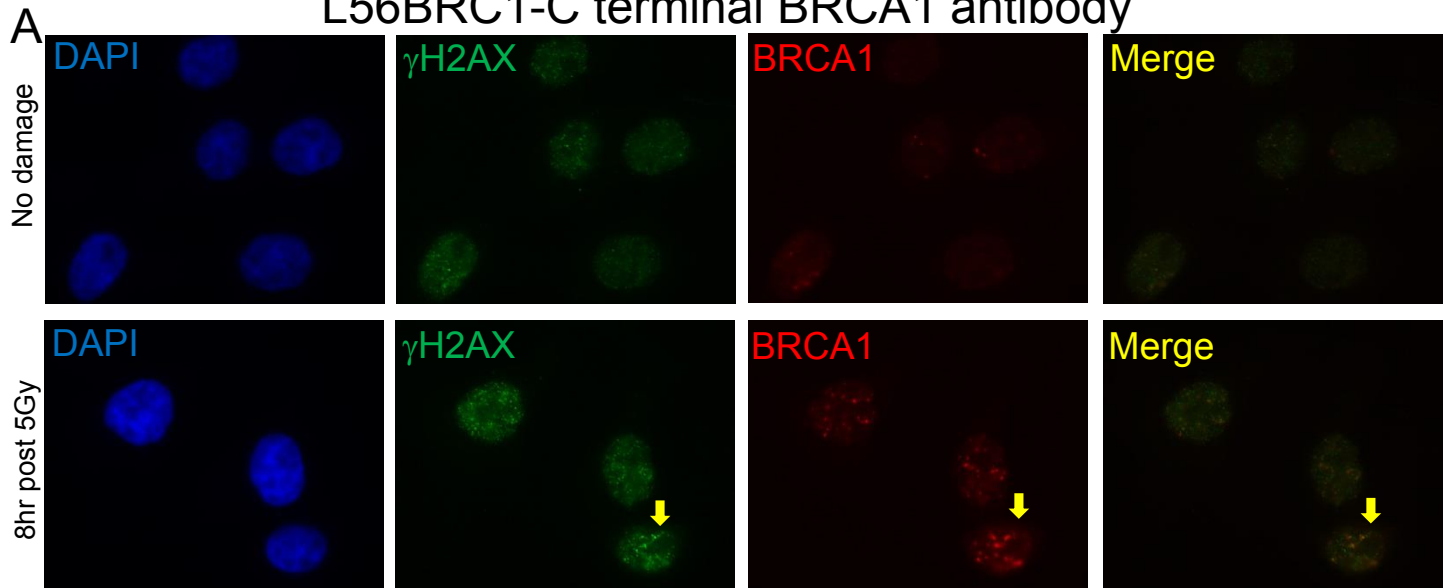

### L56BRC1-exon 11 BRCA1 antibody

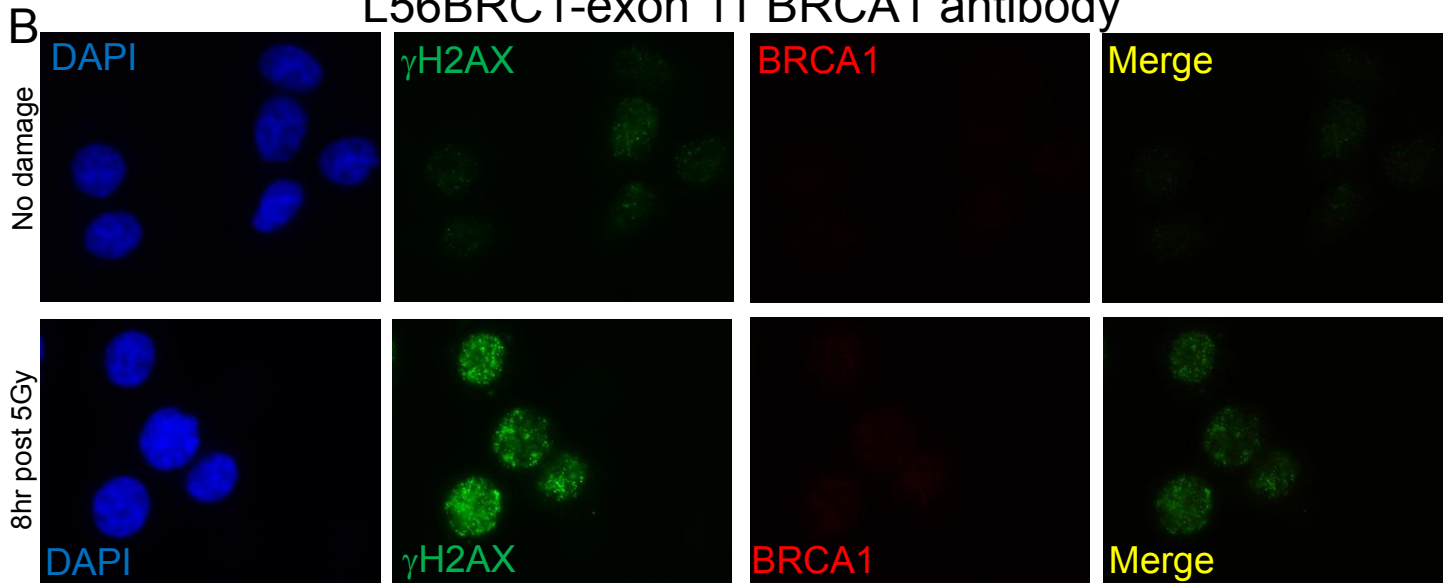

Supplementary Figs. 2, 3, 4- Post-damage BRCA1 foci in  $\Delta$ 11b expressing mutant lines are not recognized by exon 11 specific BRCA1 antibodies: The two BRCA1 mutant control lines expressing  $\Delta$ 11b but not p220 (L56BRC1-Supplementary Fig. 3 and SUM149-Supplementary Fig. 4), and a sporadic BLC line (MDA MB 231-Supplementary Fig. 2) were exposed to 5Gy gamma irradiation (IR) or no IR and allowed to recover for 8hr. All cells were then stained with a C-terminal specific BRCA1 antibody that recognizes both p220 and  $\Delta$ 11b (Supplementary Figs. 2A, 3A, 4A) or an exon 11 BRCA1 antibody that cannot recognize  $\Delta$ 11b (Supplementary Figs. 2B, 3B, and 4B), both along with  $\gamma$ H2AX to mark DNA damage. Yellow arrows are placed next to a few representative cells in which there is co-localization. The brightness has been increased by 20% and the contrast increased by 20% using PowerPoint in every panel to alleviate difficulties with the conversion of the images to PDF.

## Supplementary Figure 4

### SUM149-C terminal BRCA1 antibody

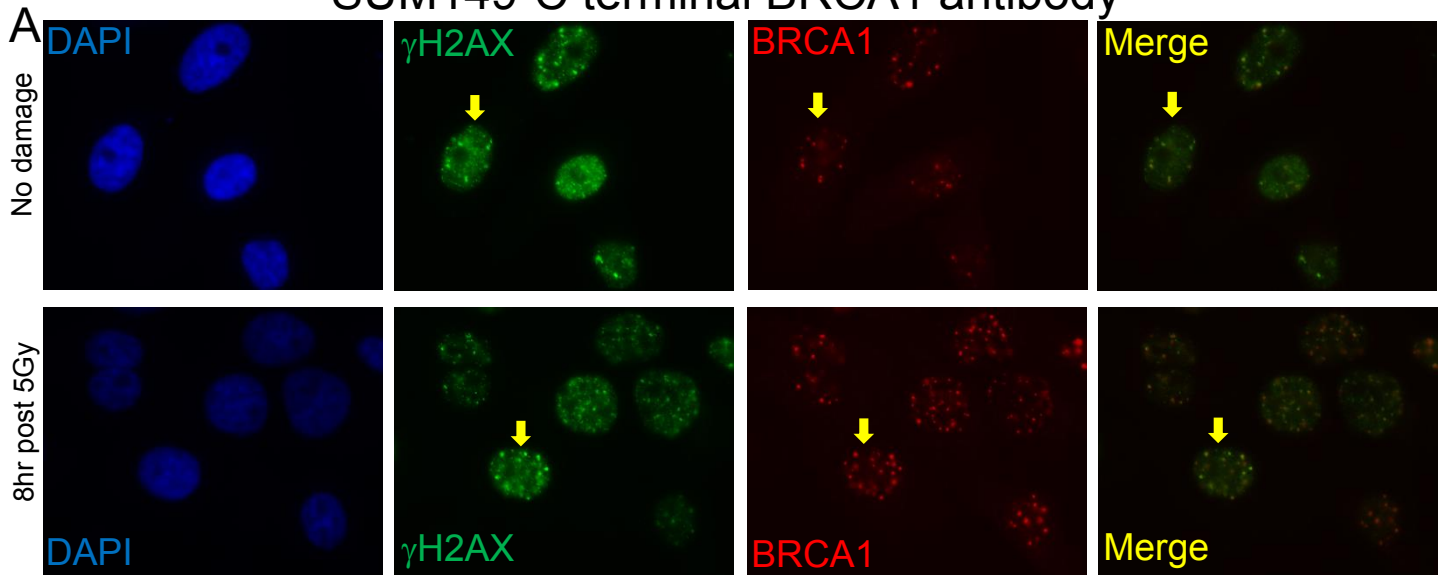

### SUM149-exon 11 BRCA1 antibody

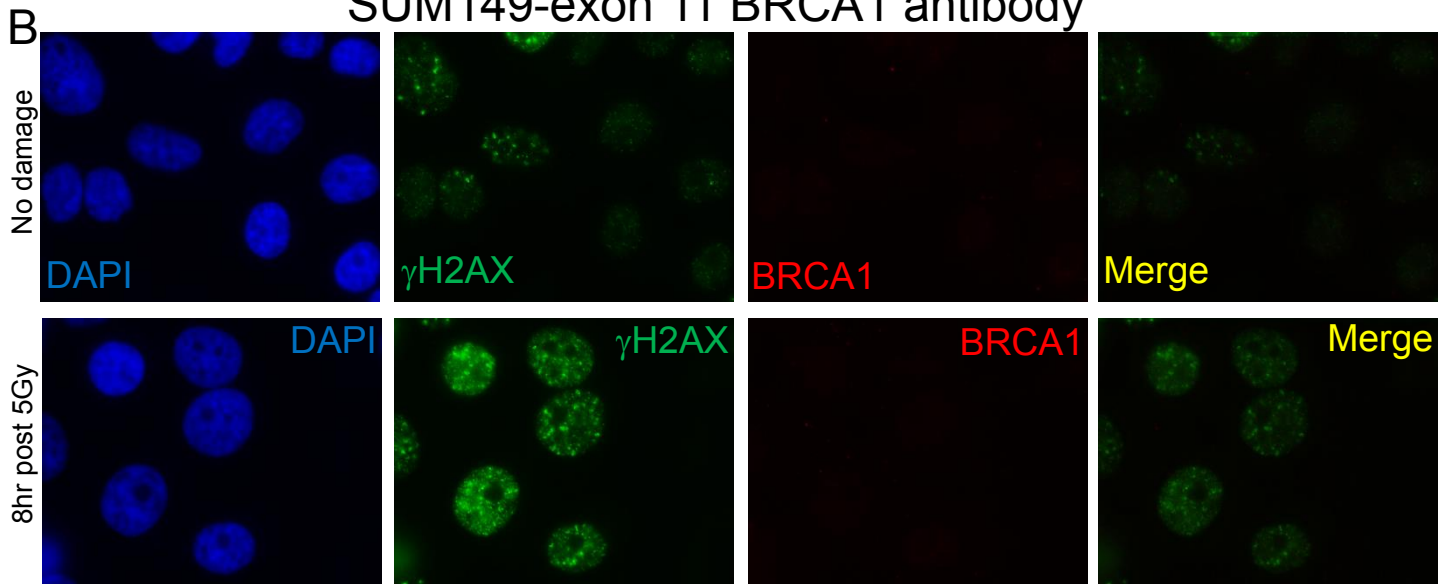

Supplementary Figs. 2, 3, 4- Post-damage BRCA1 foci in  $\Delta 11b$  expressing mutant lines are not recognized by exon 11 specific BRCA1 antibodies: The two BRCA1 mutant control lines expressing  $\Delta 11b$  but not p220 (L56BRC1-Supplementary Fig. 3 and SUM149-Supplementary Fig. 4), and a sporadic BLC line (MDA MB 231-Supplementary Fig. 2) were exposed to 5Gy gamma irradiation (IR) or no IR and allowed to recover for 8hr. All cells were then stained with a C-terminal specific BRCA1 antibody that recognizes both p220 and  $\Delta 11b$  (Supplementary Figs. 2A, 3A, 4A) or an exon 11 BRCA1 antibody that cannot recognize  $\Delta 11b$  (Supplementary Figs. 2B, 3B, and 4B), both along with  $\gamma$ H2AX to mark DNA damage. Yellow arrows are placed next to a few representative cells in which there is co-localization. The brightness has been increased by 20% and the contrast increased by 20% using PowerPoint in every panel to alleviate difficulties with the conversion of the images to PDF.



Supplementary  
Figure 5

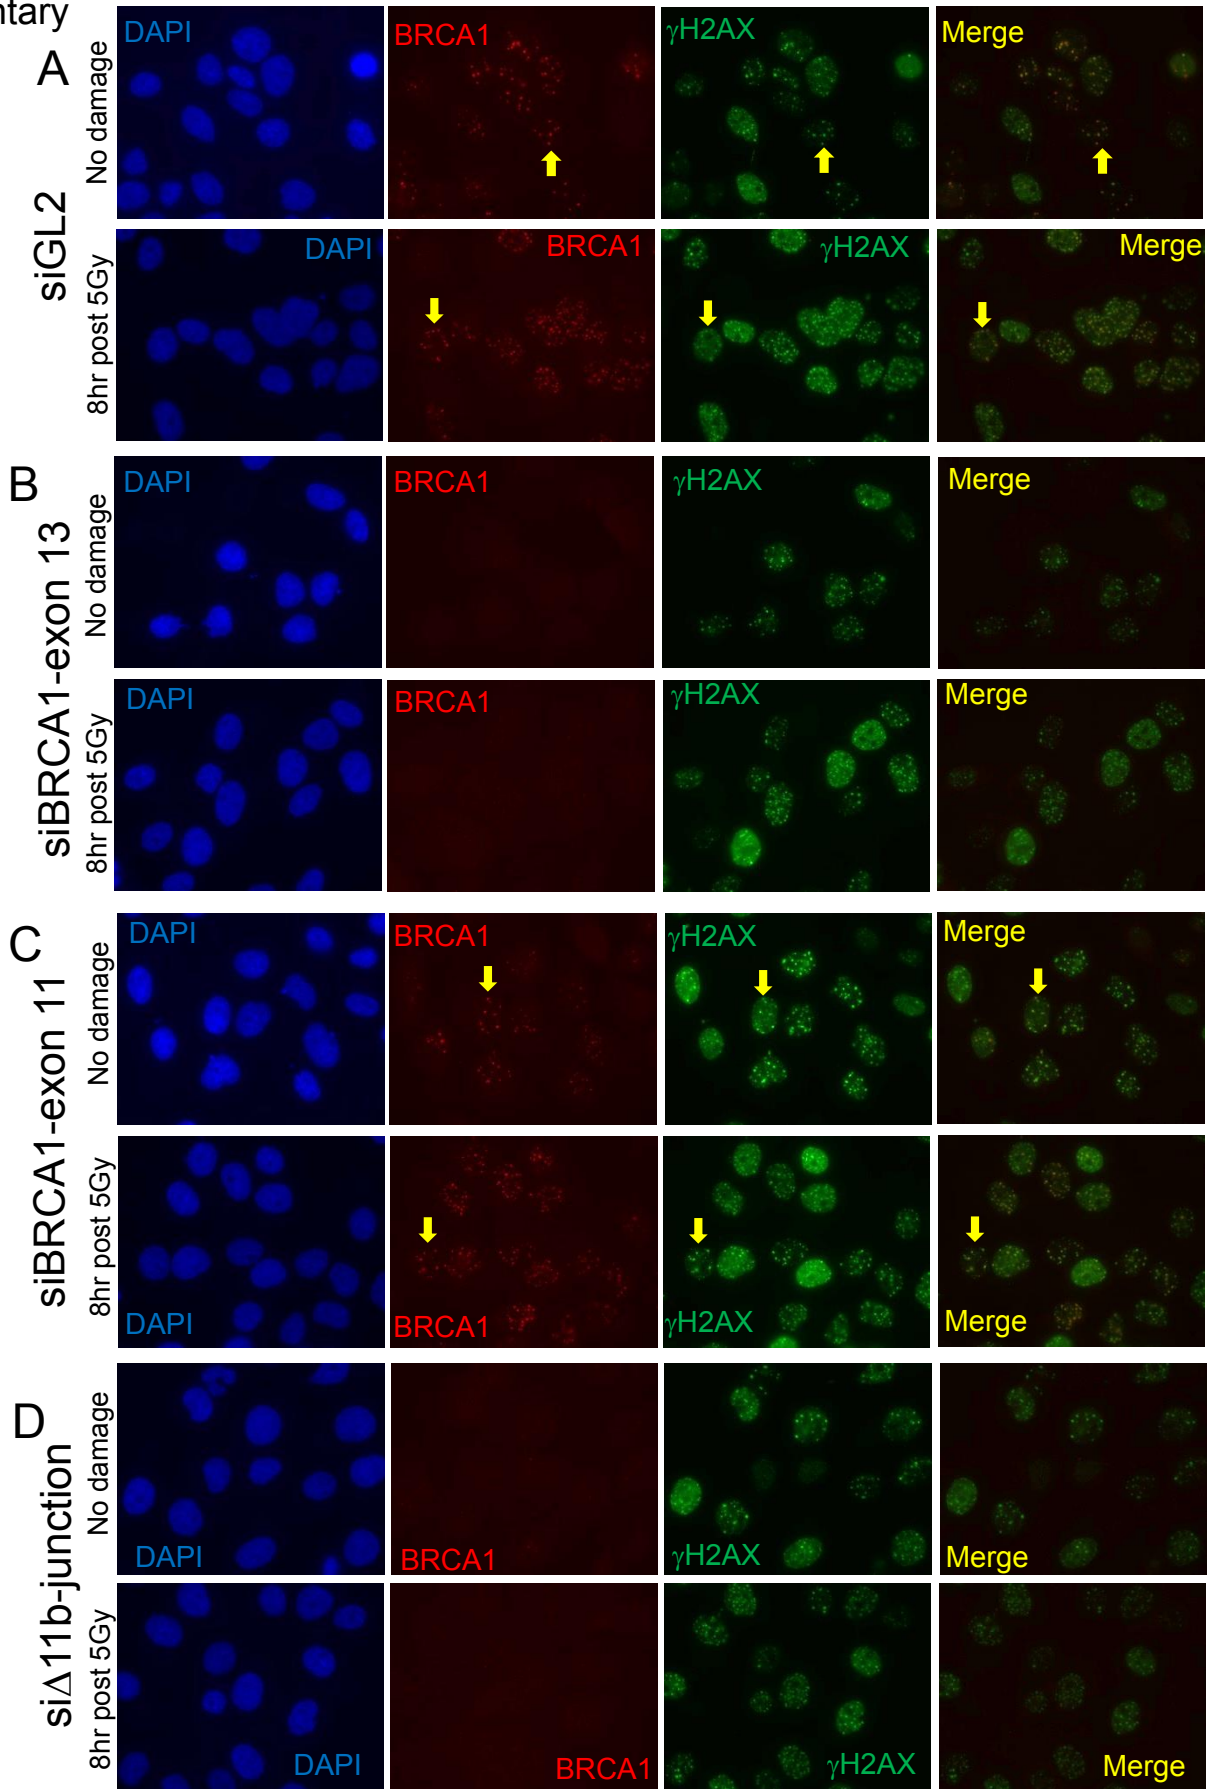

Supplementary Fig. 5-Post-Damage BRCA1 foci apparent in a BRCA1 mutant cell line able to express  $\Delta$ 11b disappeared when the line was transfected with a  $\Delta$ 11b-specific siRNA: The BRCA1 mutant cell line, SUM149, expresses  $\Delta$ 11b but not p220. It was transfected with either a control siRNA (siGL2) (S5A), an exon 13-directed BRCA1 siRNA (S5B), an exon 11-directed BRCA1 siRNA (S5C), or a  $\Delta$ 11b junction-directed siRNA (S5D) (The targets of all siRNAs were mapped in Figure 5B). These cells were exposed to either 5Gy gamma irradiation or mock treated, allowed to recover for 8hrs, and fixed. Immunofluorescence was then performed for BRCA1 with a C-terminal specific BRCA1 antibody and for  $\gamma$ H2AX. Yellow arrows are placed next to a few representative cells in which there is co-localization. The brightness has been increased by 20% and the contrast decreased by 20% using PowerPoint in every panel to alleviate difficulties with the conversion of the images to PDF.

| Supplementary Table 1-HR reporter data corresponding to Figure 5C                                                                      |                                     |              |              |              |              |                          |                           |
|----------------------------------------------------------------------------------------------------------------------------------------|-------------------------------------|--------------|--------------|--------------|--------------|--------------------------|---------------------------|
| Percent GFP-positive cells for each cell line with each siRNA for each of four separate experiments                                    |                                     |              |              |              |              |                          |                           |
| <b>SUM149</b>                                                                                                                          |                                     | <b>Day 1</b> | <b>Day 2</b> | <b>Day 3</b> | <b>Day 4</b> | <b>Average of 4 days</b> | <b>Standard Deviation</b> |
|                                                                                                                                        | SUM149 siGL2                        | 0.34         | 0.34         | 0.47         | 0.25         | 0.35                     | 0.09                      |
|                                                                                                                                        | SUM149 siB1 ex 11 #1                | 0.06         | 0.16         | 0.10         | 0.08         | 0.10                     | 0.04                      |
|                                                                                                                                        | SUM149 siB1 ex 11 #2                | 0.05         | 0.15         | 0.15         | 0.11         | 0.11                     | 0.05                      |
|                                                                                                                                        | SUM149 si $\Delta$ 11b junction     | 0.10         | 0.17         | 0.23         | 0.12         | 0.16                     | 0.06                      |
|                                                                                                                                        | SUM149 siB1 ex 13                   | 0.17         | 0.23         | 0.33         | 0.31         | 0.26                     | 0.08                      |
| <b>MDA MB 231</b>                                                                                                                      |                                     | <b>Day 1</b> | <b>Day 2</b> | <b>Day 3</b> | <b>Day 4</b> | <b>Average of 4 days</b> | <b>Standard Deviation</b> |
|                                                                                                                                        | MDA MB 231 siGL2                    | 0.48         | 0.84         | 0.73         | 1.15         | 0.80                     | 0.28                      |
|                                                                                                                                        | MDA MB 231 siB1 ex 11 #1            | 0.19         | 0.37         | 0.21         | 0.20         | 0.24                     | 0.09                      |
|                                                                                                                                        | MDA MB 231 siB1 ex 11 #2            | 0.03         | 0.18         | 0.20         | 0.14         | 0.14                     | 0.07                      |
|                                                                                                                                        | MDA MB 231 si $\Delta$ 11b junction | 0.36         | 0.67         | 0.59         | 0.80         | 0.61                     | 0.18                      |
|                                                                                                                                        | MDA MB 231 siB1 ex 13               | 0.03         | 0.14         | 0.07         | 0.12         | 0.09                     | 0.05                      |
| <b>HCC38</b>                                                                                                                           |                                     | <b>Day 1</b> | <b>Day 2</b> | <b>Day 3</b> | <b>Day 4</b> | <b>Average of 4 days</b> | <b>Standard Deviation</b> |
|                                                                                                                                        | HCC38 siGL2                         | 2.05         | 1.44         | 2.35         | 2.51         | 2.09                     | 0.47                      |
|                                                                                                                                        | HCC38 siB1 ex 11 #1                 | 0.46         | 0.39         | 0.51         | 0.42         | 0.44                     | 0.05                      |
|                                                                                                                                        | HCC38 siB1 ex 11 #2                 | 0.62         | 0.43         | 0.91         | 0.61         | 0.64                     | 0.20                      |
|                                                                                                                                        | HCC38 si $\Delta$ 11b junction      | 1.98         | 1.40         | 2.15         | 2.65         | 2.04                     | 0.52                      |
|                                                                                                                                        | HCC38 siB1 ex 13                    | 0.48         | 0.47         | 0.86         | 0.78         | 0.65                     | 0.20                      |
| Percent GFP-positive cells relative to the siGL2 transfection for each cell line with each siRNA for each of four separate experiments |                                     |              |              |              |              |                          |                           |
| <b>SUM149</b>                                                                                                                          |                                     | <b>Day 1</b> | <b>Day 2</b> | <b>Day 3</b> | <b>Day 4</b> | <b>Average of 4 days</b> | <b>Standard Deviation</b> |
|                                                                                                                                        | SUM149 siGL2                        | 100.00       | 100.00       | 100.00       | 100.00       | 100.00                   | 0.00                      |
|                                                                                                                                        | SUM149 siB1 ex 11 #1                | 15.18        | 45.31        | 31.18        | 42.93        | 33.65                    | 13.78                     |
|                                                                                                                                        | SUM149 siB1 ex 11 #2                | 49.11        | 67.67        | 70.97        | 125.56       | 78.33                    | 32.93                     |
|                                                                                                                                        | SUM149 si $\Delta$ 11b junction     | 30.95        | 51.19        | 48.82        | 46.98        | 44.49                    | 9.19                      |
|                                                                                                                                        | SUM149 siB1 ex 13                   | 18.45        | 47.66        | 21.94        | 32.38        | 30.11                    | 13.11                     |
| <b>MDA MB 231</b>                                                                                                                      |                                     | <b>Day 1</b> | <b>Day 2</b> | <b>Day 3</b> | <b>Day 4</b> | <b>Average of 4 days</b> | <b>Standard Deviation</b> |
|                                                                                                                                        | MDA MB 231 siGL2                    | 100.00       | 100.00       | 100.00       | 100.00       | 100.00                   | 0.00                      |
|                                                                                                                                        | MDA MB 231 siB1 ex 11 #1            | 39.00        | 44.32        | 28.51        | 17.65        | 32.37                    | 11.81                     |
|                                                                                                                                        | MDA MB 231 siB1 ex 11 #2            | 7.05         | 21.77        | 27.01        | 11.91        | 16.94                    | 9.09                      |
|                                                                                                                                        | MDA MB 231 si $\Delta$ 11b junction | 75.52        | 79.79        | 79.81        | 69.74        | 76.21                    | 4.76                      |
|                                                                                                                                        | MDA MB 231 siB1 ex 13               | 6.85         | 16.53        | 9.55         | 10.35        | 10.82                    | 4.09                      |
| <b>HCC38</b>                                                                                                                           |                                     | <b>Day 1</b> | <b>Day 2</b> | <b>Day 3</b> | <b>Day 4</b> | <b>Average of 4 days</b> | <b>Standard Deviation</b> |
|                                                                                                                                        | HCC38 siGL2                         | 100.00       | 100.00       | 100.00       | 100.00       | 100.00                   | 0.00                      |
|                                                                                                                                        | HCC38 siB1 ex 11 #1                 | 22.38        | 26.77        | 21.76        | 16.92        | 21.96                    | 4.03                      |
|                                                                                                                                        | HCC38 siB1 ex 11 #2                 | 30.39        | 29.55        | 38.46        | 24.54        | 30.74                    | 5.76                      |
|                                                                                                                                        | HCC38 si $\Delta$ 11b junction      | 96.76        | 96.99        | 91.46        | 105.89       | 97.77                    | 5.98                      |
|                                                                                                                                        | HCC38 siB1 ex 13                    | 23.65        | 32.68        | 36.63        | 31.30        | 31.07                    | 5.44                      |

Supplementary Table 1-HR reporter data corresponding to Figure 5C: Results from homologous recombination (HR) reporter assays on each cell line with each siRNA for four separate experiments. On the top panel, the percentage of GFP positive cells is reported. On the bottom panel the percentage of GFP positive cells relative to the siGL2 control is reported. (B1=BRCA1, ex=exon)
